# Supplementary material
Source: PubMed Central journal article supplement (PMC4938761)

3 months

6 months

12 months

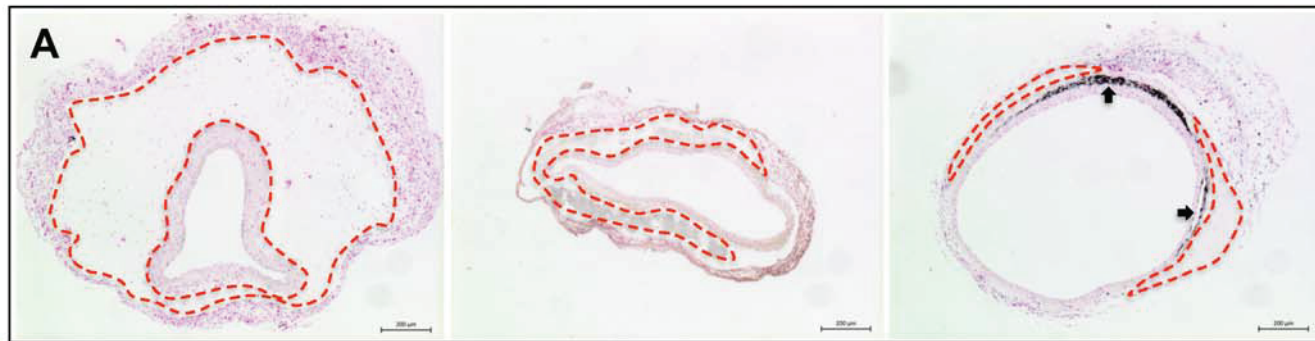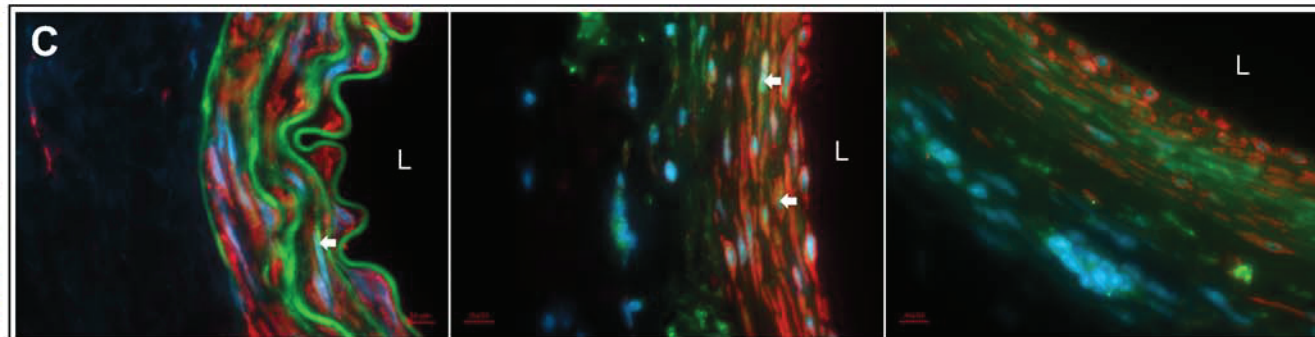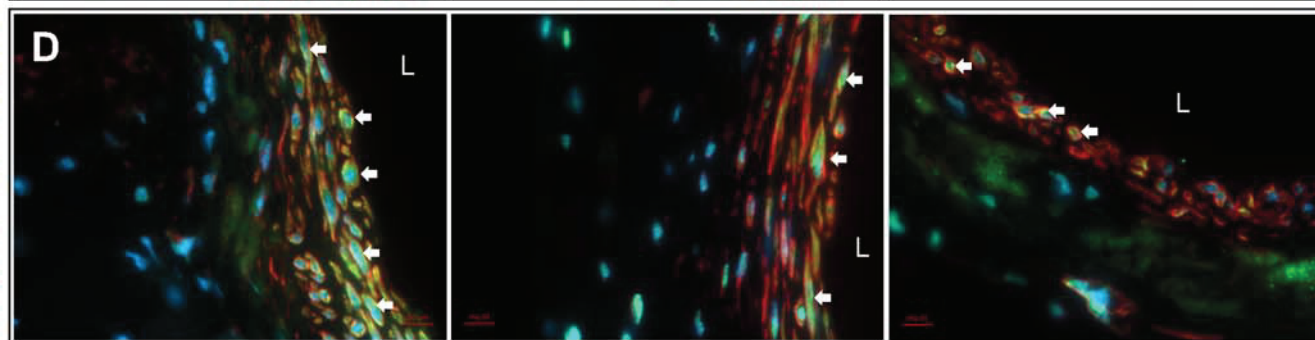

**B**

**F4/80 (+) Cells**

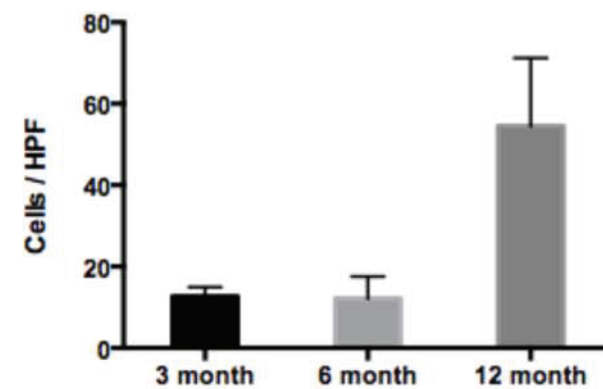

**E**

**SMC Differentiation and Apoptosis**

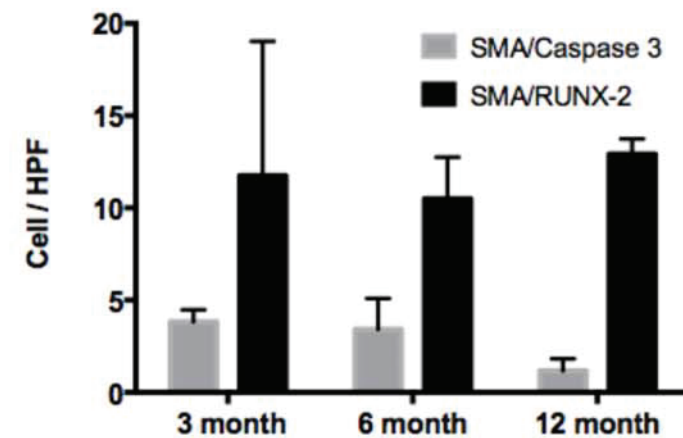

Supplement: NIHMS754030-supplement-Supplementary_Figure_2.pdf [file NIHMS754030-supplement-Supplementary_Figure_2.pdf]
